# Supplementary material for: Lineage barcoding in mice with homing CRISPR
Source: Springer Nature journal article supplement (doi:10.1038/s41596-020-00485-y), 2021-03-10
Supplement: MOESM3 [file 41596_2020_485_MOESM3_ESM16.xlsx]

## Sheet: Sheet1
Founder	hgRNA No.	Identifier (ID)	Spacer sequence (TSS to PAM)	Spacer Length	Inheritance%	Location	Location confidence
PB7	1	AAACCCCGGG	GGTAGCAAACGTTTGGACGTG	21	49.6	chr12:84168907:+	High
PB7	2	AACGCCCTAC	GGTGCCCTTACTCTCACCTGATTACTTAATCCGTG	35	55.2	chr7:100292848:+	High
PB7	3	AACTATCGGC	GGTAAAGGGCATATGAGGGAGGGAATCGATGTGTG	35	55.2	chr4:147419769:+	Low
PB7	4	AACTCACCTA	GGTCGGATCTACGAAAGTGTG	21	29.6	chr14:112445289:+	High
PB7	5	AAGACTTCAT	GGTTGGTGACATCGTCGTTTAGCTCGTTGAGAGTG	35	41.6	chr6	Linkage
PB7	6	AAGCCGCGCG	GGTGTAACTTAACACTGAGTG	21	54.4	chr2:69904041:-	High
PB7	7	ACATTCGGTT	GGTCGATTCATATCGAAACCTTCCCGTGACAGTG	34	43.2	chr19:23587076:-	High
PB7	8	ACCACTGCTG	GGTTGGTAGCGCTCCGCGTATGAGGTTGTG	30	16.8*
PB7	9	ACCCTGGGAC	GGTAGAAGTATAGCAACAGCCACTCTCAACTAGTG	35	51.2	chr19:44781921:-	High
PB7	10	ACTCCATGTT	GGTATGAGAATCGGTAGTCATGGTG	25	42.4	chr4:152649298:+	High
PB7	11	ACTCGGTTAC	GGTGAGGACTTGCGCAGTGCGAGTG	25	35.2	chr4:103214352:-	High
PB7	12	AGACCCTCGC	GGTGCATTCGAAAGTCCGGTCGTAGTGTGGACGTG	35	48.8	chr17:32993034:+	High
PB7	13	AGCACTGTAC	GGTTCATGAAAAACATACTTAGACGACGGTCCGTG	35	42.4	chr6:59682549:-	Medium
PB7	14	AGCCCAAATC	GGTTGACACGCTAGGTGTTGAAAAACTTGTTGGTG	35	43.2	chr7:106645806:-	Medium
PB7	15	AGTCTGCCTC	GGTCCGTAGGAGACCCGTGTGGCATGTACCTGTG	34	60.8	chr11:51639162:-	High
PB7	16	AGTTTCCGAA	GGTAGAACGCTTGAAGCACTAGTTGTTCGGTGGTG	35	47.2	chr9:23011278:-	High
PB7	17	ATGCTTAGCT	GGTTTACGTTGCATCGGTGTG	21	59.2	chr11:53401186:+	High
PB7	18	ATGGCGCCTA	GGTGTCTCGTTGGTACGTTCTGGTG	25	50.4	chr13:84138896:+	High
PB7	19	CACAACGCCC	GGTTTGAACTACCTAGTTGTG	21	39.2	chr7:145314072:-	Medium
PB7	20	CACTCTCAAG	GGTGCTCTCGGATCATCAGTG	21	49.6	chr18:57857891:-	Medium
PB7	21	CATCGTCGTC	GGTGTACGTATGGACTGAACCAGGGTGTGCAAGTG	35	40	chr2:163466115:-	High
PB7	22	CATTGGAGGT	GGTGACAGAAGCTGCGTGGTG	21	42.4	chr4:55136321:-	High
PB7	23	CCCAAAACAC	GGTTTACTGGATTAGTTCGTG	21	80.8	chr4:53835610:- AND chr1:113070656:+	High, High
PB7	24	CCCATCACCC	GGTCGTCTGCACTACGCAGTG	21	51.2	chr3:93592769:-	Medium
PB7	25	CCCCTCACTT	GGTGGAAGGTTGTATGTTGCTAGTG	25	48	chr8:20267522:+ OR chr8:20583339:-	Medium
PB7	26	CCTCACCCCA	GGTGGCGCAGTCATTGGGTGAGGTAGCGCGTCGTG	35	46.4	chr4:31943863:-	High
PB7	27	CCTTTACCGC	GGTCGGGGCCACTCAGTGGTG	21	39.2	chr2:167014655:-	High
PB7	28	CGAATCCTTT	GGTCTCGAGTGAGGTGTTCAGGGTG	25	40	chr5:130378620:-	High
PB7	29	CGACAGTTAT	GGTTCGTGCATGCTCGACAGGCGCAAGAGACTGTG	35	52.8	chr4:45462426:+	Medium
PB7	30	CGCATGATGC	GGTTCGTTTCATGCTCACGACTTAATTGACATGTG	35	55.2	chr5:114521001:-	High
PB7	31	CGCCGTAGTA	GGTGTGGTCGAAGGTCGGGTCGTGGGTGGAGTGTG	35	58.4	chr9:85135810:-	High
PB7	32	CGTAGGGCCC	GGTGGTAATTTAGAGGTACAAAGT	24	44	chr11:98129357:+	High
PB7	33	CGTGTTGTCT	GGTGACATTGGGTACAGGGTG	21	55.2	chr13	Linkage
PB7	34	CTACTCGGCC	GGTACCTTTGTTGATGCTGGGTGGAAGGAATTGTG	35	40	chr2:116850098:+	High
PB7	35	CTGAGTTTTA	GGTCAAGAGCTAACGCGTAGTGGTG	25	52	chr19:54021355:+	High
PB7	36	CTGCTATCGA	GGTTGTGTCACCTTCACAGTG	21	45.6	chr8:64294161:-	Low
PB7	37	CTTTTGTCGG	GGTGTAATCCAAAGCTATTAACATCATGAGTTGTG	35	51.2	chr4:11578767:+	Medium
PB7	38	GAAGACCCGC	GGTCGGCGGCAATCGTGGGTG	21	38.4	chr13:48018178:+	High
PB7	39	GACACAGACA	GGTAGCAAGTGCGAGACGTGTTGTG	25	54.4	chr7:97091435:-	Medium
PB7	40	GACCTCCAAT	GGTGTACACAGAGTCGACTACCCAGTATGTTCGTG	35	45.6	chr9	Linkage
PB7	41	GATACCCCCA	GGTCCAAAATGTCGCCACGTG	21	38.4	chr2:181932341:-	Low
PB7	42	GCCAAGATGG	GGTCGATAGATAATTCGGTGCTGGTGTGTG	30	15.2*
PB7	43	GCCAGCCGCT	GGTTAGCAGCCAATTGCGTGGCTCCTAGAGGTGTG	35	48.8	chr16:87663120:-	Medium
PB7	44	GCCCCATTCC	GGTCAGGTCACGTCGTCTGTG	21	51.2	chr14:10894128:-	High
PB7	45	GCGAAGTCCC	GGTGACTCAATATACCAGTGTTCCATGGTG	30	7.2*
PB7	46	GCTCTACGCC	GGTGCCAATGTGGTTGCGTCATGTG	25	47.2	chr18:68792401:-	Medium
PB7	47	GGCACCCTCC	GGTGTGGCTGAGAGTCCGGCAATGGTGTGGCTGTG	35	48.8	chr6:140630931:+	High
PB7	48	GGCCCCTACA	GGTAAATTTGAGGCTCCGGCATGCAGGAGGCCGTG	35	34.4	chr5:113271521:+	High
PB7	49	GGGTGACACG	GGTTGGGGCAGCGGCAAGATACATCATGCGCAGTG	35	58.4	chr11:69995251:+	High
PB7	50	GTACACAATT	GGTTAAAGTAAATTGCGAGTG	21	44	chr10:20649492:+	High
PB7	51	GTCAAATACC	GGTAGTTCTCAGAGGAAGAGCCGTG	25	36.8	chr11:21285273:+	High
PB7	52	GTGGAGCCTC	GGTTCCCGTCCAGTAATCGTG	21	53.6	chr2:173089614:-	High
PB7	53	TAACTGCTCT	GGTTAATGGGACCGCAGGTACTTGACTGGGATGTG	35	47.2	chr3	Linkage
PB7	54	TAACTTATAC	GGTAACTATATTCATGCGATATCGCCGTATCAGTG	35	73.6	chr13:55598605:+ AND chr10:115251722:-	High, Medium
PB7	55	TAGCCATGCA	GGTCGTTGTAGCAACCTATCGGGTG	25	68.8	chr14:122192615:+	High
PB7	56	TCTATCGAGG	GGTTATATTTGTAAGTGTGTG	21	55.2	chr2:31153437:-	High
PB7	57	TCTCTAGATC	GGTTAAGCTCCCGTGCCCTATAACGCAAAATGTG	34	44	chr11:88908785:+	High
PB7	58	TTAGCTATGT	GGTTACATTGAGAACTTCGTG	21	43.2	chr6:135360506:+	Medium
PB7	59	TTGAGCATAA	GGTTAAGCCGAGGAGTTAGTG	21	50.4	chr2:39102456:+	Medium
PB7	60	TTTGGCACAC	GGTAGCAGCGGCAGGCGTGATGGTG	25	51.2	chr3:84200519:-	High
PB3	61	AAGGCGGATC	GGTACCACTCCCGTCGGGAGTAGTG	25	56.4	chr6:65936793:+	High
PB3	62	ACAAATCCTG	GGTAGGAGAGTGGTCACCGTATTCATTATAGGTG	34	54.5	chr5:77674289:+	Low
PB3	63	ACGTCGCGGA	GGTAGAACATGGTCGACATATAGTG	25	51.5	chr18:69405086:+	High
PB3	64	AGCACACCCA	GGTCCTGTCGCCACGGGTGTG	21	45.5	chr7:43168207:+	Medium
PB3	65	AGGATACGCC	truncated	0	53.5	chr2	Linkage
PB3	66	AGGTGTTCAA	GGTAATAATTCCTGCCGGGTG	21	48.5	chrX:70714301:-	High
PB3	67	ATAGCTGATG	GGTTACCTGGGACGCTATCAGTGTAACAACTTGTG	35	40.6	chr8:93092671:+	Medium
PB3	68	ATGACCCACC	GGTATATAAAAATACGAGTACAGTG	25	49.5	chr4:133598735:-	High
PB3	69	ATGGAGGGAC	GGTCGTCGCTATATCATTGTG	21	51.5	chr1:74546775:-	High
PB3	70	ATGTCATCGA	GGTAGACCCTGTTGCTTCGTG	21	47.5	chr13:68978391:-	Medium
PB3	71	CAAGGGCCCT	GGTTTCCCAAAAGGAGCTGTG	21	48.5	chr11:6379382:+	Low
PB3	72	CAATCCGACT	GGTACAACCGTCTCACTTGGTCGTG	25	49.5	chr11:54522259:+	High
PB3	73	CACCTCGGAC	GGTGCGGCGAGGTCGTTCGTG	21	51.5	chr11:69582060:-	High
PB3	74	CACGGGTAAT	GGTACCTGTAGATTTGTTTATCGTG	25	53.5	chr13:112763951:+	High
PB3	75	CACTTAATTC	GGTGTG	6	52.5
PB3	76	CATACCCCAC	GGTCACGCGCCTATATGCCTAGTGACCGAAGAGTG	35	51.5	chr9:24475646:+	Medium
PB3	77	CATATATTCC	GGTCTCGTATCCATGTATGTG	21	53.5	chr10:70566986:+	Medium
PB3	78	CCACCATCCG	GGTGGCAATAGGATGAGTGGAGTG	24	44.6	chr3:40499542:+	High
PB3	79	CCACTAACTT	GGTAAATTTAGCATCGATGACAAGGTTGCGGTGTG	35	56.4	chr3:7116056:-	Medium
PB3	80	CCGTACTTCA	GGTACTCCGGAAGGCCAAGTG	21	59.4	chr9:44306160:+	Mediium
PB3	81	CCTACAACAG	GGTGCAGCGAACAAGTACGTCTTCACGAGCAAGTG	35	47.5	chr17:35503811:-	High
PB3	82	CCTTAAGCGC	GGTAGCTGGGACCATCGATAGAGTG	25	53.5	chr3:62486695:+	Medium
PB3	83	CGGGGGTTCC	GGTCTTGGTTCTAGGGTAGTG	21	54.5	chr10:4379180:+	High
PB3	84	CGGTCTGTAC	GGTCCAAAGGCGTCGGACGTG	21	53.5	chr7:34168138:+	High
PB3	85	CTCGTAAGTC	GGTCATGTCAATGCGGTGTG	20	52.5	chr1:181623180:+	High
PB3	86	GAACCGCTGG	GGTGCAAAAGGGGTAGTGGACCGTG	25	50.5	chr11:106032156:-	Low
PB3	87	GACCCTTCCT	GGTCGGCCAGAGGTAATCACATGTG	25	52.5	chr17:31266461:-	High
PB3	88	GACGAAGACA	GGTGCAAGTACCTTCTGGGTG	21	47.5	chr2:109961046:+	Low
PB3	89	GACGGTTCCA	GGTTTCCACGGCGCACATGCGGGTATTAAGGCGTG	35	52.5	chr6	Linkage
PB3	90	GACTCTGGCC	GGTGCATATAGGAGTGCAGCCAAGAGTCCTATGTG	35	49.5	chr4:143414949:-	Medium
PB3	91	GAGCGCTGGG	GGTGACACAAGTGTGGATGGATTGGCTGACGTGTG	35	52.5	chr2:35741705:+	Medium
PB3	92	GCCAACGAGC	GGTAATCAGAGGTGAACGTAAGGTG	25	56.4	chr2:129066301:-	High
PB3	93	GCCCACCACA	GGTAAGTTTCTTCATCGGTTGAGGCGGTGATGGTG	35	57.4	chr11:30920617:-	High
PB3	94	GCCCAGATAC	GGTCCCTCCGCATACAGCTGTCGTG	25	47.5	chr10:120618315:+	Medium
PB3	95	GCGTCGCCCT	GGTGTCCGCTGCCAGCTCCATTGTG	25	51.5	chr15:99853105:-	Low
PB3	96	GGCCTTTGAC	GGTTGTCCCTCCATAGGGAGTGTCTCGGTG	30	40.6	chr8	Linkage
PB3	97	GGCGACCGCA	GGTCCCGGTAGAACCAAAGGCTGTG	25	50.5	chr3:60618028:+	High
PB3	98	GTATCCCGAG	GGTCCATCCATGAAGGTCGCAAGTG	25	44.6	chr17:21947861:-	Medium
PB3	99	TACACAGATA	GGTGATAAAGGGCTGAGAGTG	21	54.5	chr6:120263428:+	High
PB3	100	TACACCCCAC	GGTTCGCGCGGAATCTTTGTG	21	52.5	chr16:4490205:-	Low
PB3	101	TAGAACCATG	GGTTCGGCCTCTTTAAGAGTG	21	42.6	chr8	Linkage
PB3	102	TCATACGGGC	GGTAGCAAGAGTACGGCTCTATAACGACAGCCGTG	35	48.5	chr1:10592957:-	High
PB3	103	TCATCAGGCC	GGTGAGAAACCTTTCTAAGTG	21	47.5	chr13:66628819:-	Low
PB3	104	TCTCCGGGCA	GGTGTAGCCAGTGTAGACCAATCGATAGCAGTGTG	35	57.4	chr13:44869707:-	Low
PB3	105	TCTTATAACC	GGTAACCAGCGCATGCTCCAAAGTG	25	42.6	chr12:94794293:-	Medium
PB3	106	TGACGGTTCT	GGTACACCGCGTAATGGTATACTACCGTAAAGGTG	35	47.5	chr14:111428631:-	Low
PB3	107	TGCCAGCTGA	GGTAAAGGGAGACTACCCTATCGTG	25	54.5	chr18:34118169:+	High
PB3	108	TGGTGATGGT	GGTCAAACCTGGATAGAAGTG	21	51.5	chr11:65066780:-	High
PB3	109	TGGTTTCTTT	GGTCTGGCGAATTGCTGAGTG	21	51.5	chr3:90121563:+	Medium
PB3	110	TTACCACGAA	GGTGTGGAACGGGGCCCCCAGGGTGGCCCCGAGTG	35	52.5	chr3:111372033:+	Medium
PB3	111	TTATCGTTCA	GGTGGGTAGCTGGGTGCCCTACTGACCTAATTGTG	35	52.5	chr10:43275101:-	High
PB3	112	TTGTGACATA	GGTCGTTATCAACTCATGGAACGTG	25	53.5	chr1	Linkage
*: These L30 hgRNAs were detected in less than half of the offspring due to the performance of the PCR primer used for these and only these three L30 hgRNAs. The issue was rectified in the single L30 hgRNA from the PB3 founder.
