# Supplementary material for: Lineage barcoding in mice with homing CRISPR
Source: Springer Nature journal article supplement (doi:10.1038/s41596-020-00485-y), 2021-03-10
Supplement: MOESM4 [file 41596_2020_485_MOESM4_ESM17.xlsx]

## Sheet: TableS3-hgRNA Activities
Founder	#	identifier	E0	E3.5	E6.5	E7.5	E8.5	E10.5	E12.5	E15.5	E16.5	Adult	Class
PB7	1	AAACCCCGGG	0	0.62	0.91	0	0.63	0	0.67	na	0.46	0.57	inactive
PB7	2	AACGCCCTAC	0	0	0	0	0	0	0	na	0.14	0	inactive
PB7	3	AACTATCGGC	0	0	0	0	0	0	0	na	0	0	inactive
PB7	4	AACTCACCTA	0	0	0	0	0	0	0	na	0	0	inactive
PB7	5	AAGACTTCAT	0	0	na	0	0	0	0	na	na	0	inactive
PB7	6	AAGCCGCGCG	0	4.75	7.51	31.27	33.2	66.01	61.58	na	72.84	88.6	mid
PB7	7	ACATTCGGTT	0	0	0	0	0	2.26	2.86	na	na	3.2	slow
PB7	8	ACCACTGCTG	0	na	0	0	0	5.11	4.52	na	5.24	12.95	slow
PB7	9	ACCCTGGGAC	0	0	0	0	0	0	0.4	na	10.3	1.81	slow
PB7	10	ACTCCATGTT	0	0	0	0	0.64	3.61	4.94	na	1.3	2.31	slow
PB7	11	ACTCGGTTAC	0	0	0	0	0	0	0	na	0	0	inactive
PB7	12	AGACCCTCGC	0	0	0	0	0	0	0	na	na	0	inactive
PB7	13	AGCACTGTAC	0	0	na	0	0	0	1.14	na	na	1.47	inactive
PB7	14	AGCCCAAATC	0	0	0	0	0	0	0	na	na	0	inactive
PB7	15	AGTCTGCCTC	0	0	0	0.52	0	1.69	2.32	na	3.02	4.41	slow
PB7	16	AGTTTCCGAA	0	0	0	0	0	0	0	na	0	0	inactive
PB7	17	ATGCTTAGCT	0	0	na	9.36	7.01	14.73	17.94	na	11.18	21.15	slow
PB7	18	ATGGCGCCTA	0	0	0	0.53	0	0.77	1.21	na	0.76	3.64	slow
PB7	19	CACAACGCCC	0	83.68	91.28	97.06	100	100	100	na	100	100	fast
PB7	20	CACTCTCAAG	0	78.3	100	100	100	100	100	na	100	100	fast
PB7	21	CATCGTCGTC	0	0	0	0	0	0.3	1.08	na	na	2.75	slow
PB7	22	CATTGGAGGT	0	53.6	70.06	83.18	55.72	84.53	96.22	na	99.35	100	mid
PB7	23	CCCAAAACAC	0	15.73	26.91	58.1	64.66	80.36	89.29	na	79.76	96.86	mid
PB7	24	CCCATCACCC	0	0	0	0	0	0	0	na	na	0	inactive
PB7	25	CCCCTCACTT	0	0	0	0	0	0.34	0	na	0	0	inactive
PB7	26	CCTCACCCCA	0	0	0	0	0	0	0	na	0	0	inactive
PB7	27	CCTTTACCGC	0	0	0	0	0.88	1.58	1.1	na	na	3.11	slow
PB7	28	CGAATCCTTT	0	0	0.57	0	0	0.44	0	na	0	2.12	slow
PB7	29	CGACAGTTAT	0	0	1.67	3.83	1.49	0.82	3.73	na	na	14.31	slow
PB7	30	CGCATGATGC	0	0	0	0.66	0	0	0	na	0	0	inactive
PB7	31	CGCCGTAGTA	0	0	0	0	0	0	0	na	0	0	inactive
PB7	32	CGTAGGGCCC	0	20.7	34.93	16.76	24.36	27.57	56.04	na	43.07	52.61	mid
PB7	33	CGTGTTGTCT	0	0	0	1.37	1.09	9.72	8.93	na	16.3	33.07	slow
PB7	34	CTACTCGGCC	0	17.52	0	73.66	70.42	82.27	81.82	na	na	100	mid
PB7	35	CTGAGTTTTA	0	0	3.09	6.06	1.27	4.93	0.84	na	3.65	3.93	slow
PB7	36	CTGCTATCGA	0	12.8	100	21.27	57.89	70.88	84.79	na	88.78	100	mid
PB7	37	CTTTTGTCGG	0	0	0	0.51	0	7.79	4.61	na	na	14.84	slow
PB7	38	GAAGACCCGC	0	11.02	9.08	8.02	7.13	23.5	28	na	na	44.32	slow
PB7	39	GACACAGACA	0	19.25	25.17	62.76	84.21	75.89	82.38	na	91.51	100	mid
PB7	40	GACCTCCAAT	0	0	0	0	0	0	0	na	0	0	inactive
PB7	41	GATACCCCCA	0	35.96	na	41.05	72.68	100	90.77	na	na	98.25	mid
PB7	42	GCCAAGATGG	0	na	0	1.42	0	1.29	0.77	na	24.48	3.04	slow
PB7	43	GCCAGCCGCT	0	0	na	0	0	0.25	0.07	na	0.71	0	inactive
PB7	44	GCCCCATTCC	0	0	0	0	0	0	0	na	0	0	inactive
PB7	45	GCGAAGTCCC	0	na	0	0	na	0	0	na	0	0	inactive
PB7	46	GCTCTACGCC	0	0	0	0	1.61	3.28	4.08	na	7.01	7.45	slow
PB7	47	GGCACCCTCC	0	0	0	0	0	0	0	na	0	0	inactive
PB7	48	GGCCCCTACA	0	0	0	0	0	0	0	na	2.59	0	slow
PB7	49	GGGTGACACG	0	0	0	0	1.77	11.16	9.98	na	10.36	18.92	slow
PB7	50	GTACACAATT	0	29.9	81.15	60.49	79.78	90.56	94.8	na	93.53	100	mid
PB7	51	GTCAAATACC	0	0	0	3.06	4.06	12.1	13.33	na	11.39	24.44	slow
PB7	52	GTGGAGCCTC	0	95.57	100	100	100	100	100	na	100	100	fast
PB7	53	TAACTGCTCT	0	0	0	0	0	0	0	na	0	0	inactive
PB7	54	TAACTTATAC	0	0	0	0	0	1.34	0.76	na	0	2.39	slow
PB7	55	TAGCCATGCA	0	0	0	0.55	2.03	8.02	11	na	2.98	11.82	slow
PB7	56	TCTATCGAGG	0	0	0	2.65	8.34	4.55	17.42	na	10.7	18.34	slow
PB7	57	TCTCTAGATC	0	0	0	0	0	0.43	0	na	0	0	inactive
PB7	58	TTAGCTATGT	0	83.59	100	100	100	100	100	na	100	100	fast
PB7	59	TTGAGCATAA	0	87.02	100	100	100	100	100	na	100	100	fast
PB7	60	TTTGGCACAC	0	0	0	0	0	0.91	1.39	na	na	1.06	inactive
PB3	61	AAGGCGGATC	0	0	0	na	na	na	0	0	na	0	inactive
PB3	62	ACAAATCCTG	0	0	0	na	na	na	na	0	na	0	inactive
PB3	63	ACGTCGCGGA	0	0	0	na	na	na	0	0	na	0	inactive
PB3	64	AGCACACCCA	0	18.8	44.07	na	na	na	87.64	90.1	na	100	mid
PB3	65	AGGATACGCC	0	na	0	na	na	na	0	na	na	0	inactive
PB3	66	AGGTGTTCAA	0	na	24.06	na	na	na	42.06	na	na	57.86	mid
PB3	67	ATAGCTGATG	0	0	0	na	na	na	0	0	na	0	inactive
PB3	68	ATGACCCACC	0	0	0	na	na	na	0	0	na	2.14	slow
PB3	69	ATGGAGGGAC	0	na	94.22	na	na	na	100	na	na	100	fast
PB3	70	ATGTCATCGA	0	56.11	79.84	na	na	na	98.85	98.76	na	100	fast
PB3	71	CAAGGGCCCT	0	na	44.87	na	na	na	92.08	na	na	100	mid
PB3	72	CAATCCGACT	0	0	0	na	na	na	0	0	na	0	inactive
PB3	73	CACCTCGGAC	0	15.53	7.04	na	na	na	47.67	35.09	na	57.19	mid
PB3	74	CACGGGTAAT	0	0	0	na	na	na	0	0	na	0	inactive
PB3	75	CACTTAATTC	0	0	0	na	na	na	0	0	na	0	inactive
PB3	76	CATACCCCAC	0	na	1.22	na	na	na	1.46	na	na	0	inactive
PB3	77	CATATATTCC	0	36	74.38	na	na	na	97.97	99.3	na	100	mid
PB3	78	CCACCATCCG	0	na	3.79	na	na	na	21.8	na	na	40.59	slow
PB3	79	CCACTAACTT	0	0	0	na	na	na	0	0	na	0	inactive
PB3	80	CCGTACTTCA	0	35	60.96	na	na	na	94.73	91	na	100	mid
PB3	81	CCTACAACAG	0	na	na	na	na	na	na	na	na	1.05	inactive
PB3	82	CCTTAAGCGC	0	0	0	na	na	na	0	0	na	0	inactive
PB3	83	CGGGGGTTCC	0	19.84	36.9	na	na	na	75.3	76.28	na	93.11	mid
PB3	84	CGGTCTGTAC	0	0	1.15	na	na	na	0.6	0.45	na	4.6	slow
PB3	85	CTCGTAAGTC	0	76.6	95.1	na	na	na	100	100	na	100	fast
PB3	86	GAACCGCTGG	0	0	0	na	na	na	0	0	na	0	inactive
PB3	87	GACCCTTCCT	0	37.33	32.05	na	na	na	60.41	67.71	na	92.15	mid
PB3	88	GACGAAGACA	0	na	21.76	na	na	na	28.41	na	na	36.54	slow
PB3	89	GACGGTTCCA	0	0	0	na	na	na	0.33	0	na	0	inactive
PB3	90	GACTCTGGCC	0	0	0	na	na	na	1.31	0	na	0	inactive
PB3	91	GAGCGCTGGG	0	0	0	na	na	na	0	0	na	0	inactive
PB3	92	GCCAACGAGC	0	0	0	na	na	na	1.23	0.26	na	2.6	slow
PB3	93	GCCCACCACA	0	0	0.01	na	na	na	0	0	na	0	inactive
PB3	94	GCCCAGATAC	0	0	0	na	na	na	0	2.47	na	1.83	slow
PB3	95	GCGTCGCCCT	0	7.29	9.58	na	na	na	46.62	50.5	na	88.86	mid
PB3	96	GGCCTTTGAC	0	na	na	na	na	na	0	0	na	0	inactive
PB3	97	GGCGACCGCA	0	na	4.81	na	na	na	12.25	na	na	7.16	slow
PB3	98	GTATCCCGAG	0	na	na	na	na	na	na	na	na	0	inactive
PB3	99	TACACAGATA	0	17.43	32	na	na	na	81.15	87.61	na	100	mid
PB3	100	TACACCCCAC	0	11.36	23.17	na	na	na	55.75	66.57	na	78.95	mid
PB3	101	TAGAACCATG	0	11.2	15.3	na	na	na	42.66	40.79	na	72.91	mid
PB3	102	TCATACGGGC	0	na	0	na	na	na	0	0	na	0	inactive
PB3	103	TCATCAGGCC	0	38.78	89.96	na	na	na	99.92	99.85	na	100	mid
PB3	104	TCTCCGGGCA	0	na	na	na	na	na	na	na	na	0	inactive
PB3	105	TCTTATAACC	0	22.74	31.75	na	na	na	80.82	71.28	na	98.41	mid
PB3	106	TGACGGTTCT	0	0	0	na	na	na	0	0	na	0	inactive
PB3	107	TGCCAGCTGA	0	0	0	na	na	na	0	0	na	0	inactive
PB3	108	TGGTGATGGT	0	89.25	100	na	na	na	100	100	na	100	fast
PB3	109	TGGTTTCTTT	0	0	0	na	na	na	0	0	na	0	inactive
PB3	110	TTACCACGAA	0	0	0	na	na	na	0.67	0.56	na	0	inactive
PB3	111	TTATCGTTCA	0	0	0	na	na	na	2.1	0.69	na	2.36	slow
PB3	112	TTGTGACATA	0	2.2	0	na	na	na	7.92	5.02	na	10.54	slow
