# Supplementary material for: Lineage barcoding in mice with homing CRISPR
Source: Springer Nature journal article supplement (doi:10.1038/s41596-020-00485-y), 2021-03-10
Supplement: MOESM8 [file 41596_2020_485_MOESM8_ESM18.xlsx]

## Sheet: Sheet1
hgRNA No.	Forward	Reverse
1	AACACCGGTAGCAAACGTTTGGAC	GGGCCCGAATTCAAACCCCGGG
2	AACACCGGTGCCCTTACTCTCACC	GGGCCCGAATTCAACGCCCTAC
3	AACACCGGTAAAGGGCATATGAGG	GGGCCCGAATTCAACTATCGGC
4	AACACCGGTCGGATCTACGAAAGT	GGGCCCGAATTCAACTCACCTA
5	AACACCGGTTGGTGACATCGTCGT	GGGCCCGAATTCAAGACTTCAT
6	AACACCGGTGTAACTTAACACTGA	GGGCCCGAATTCAAGCCGCGCG
7	AACACCGGTCGATTCATATCGAAA	GGGCCCGAATTCACATTCGGTT
8	AACACCGGTTGGTAGCGCTCCGCG	GGGCCCGAATTCACCACTGCTG
9	AACACCGGTAGAAGTATAGCAACA	GGGCCCGAATTCACCCTGGGAC
10	AACACCGGTATGAGAATCGGTAGT	GGGCCCGAATTCACTCCATGTT
11	AACACCGGTGAGGACTTGCGCAGT	GGGCCCGAATTCACTCGGTTAC
12	AACACCGGTGCATTCGAAAGTCCG	GGGCCCGAATTCAGACCCTCGC
13	AACACCGGTTCATGAAAAACATAC	GGGCCCGAATTCAGCACTGTAC
14	AACACCGGTTGACACGCTAGGTGT	GGGCCCGAATTCAGCCCAAATC
15	AACACCGGTCCGTAGGAGACCCGT	GGGCCCGAATTCAGTCTGCCTC
16	AACACCGGTAGAACGCTTGAAGCA	GGGCCCGAATTCAGTTTCCGAA
17	AACACCGGTTTACGTTGCATCGGT	GGGCCCGAATTCATGCTTAGCT
18	AACACCGGTGTCTCGTTGGTACGT	GGGCCCGAATTCATGGCGCCTA
19	AACACCGGTTTGAACTACCTAGTT	GGGCCCGAATTCCACAACGCCC
20	AACACCGGTGCTCTCGGATCATCA	GGGCCCGAATTCCACTCTCAAG
21	AACACCGGTGTACGTATGGACTGA	GGGCCCGAATTCCATCGTCGTC
22	AACACCGGTGACAGAAGCTGCGTG	GGGCCCGAATTCCATTGGAGGT
23	AACACCGGTTTACTGGATTAGTTC	GGGCCCGAATTCCCCAAAACAC
24	AACACCGGTCGTCTGCACTACGCA	GGGCCCGAATTCCCCATCACCC
25	AACACCGGTGGAAGGTTGTATGTT	GGGCCCGAATTCCCCCTCACTT
26	AACACCGGTGGCGCAGTCATTGGG	GGGCCCGAATTCCCTCACCCCA
27	AACACCGGTCGGGGCCACTCAGTG	GGGCCCGAATTCCCTTTACCGC
28	AACACCGGTCTCGAGTGAGGTGTT	GGGCCCGAATTCCGAATCCTTT
29	AACACCGGTTCGTGCATGCTCGAC	GGGCCCGAATTCCGACAGTTAT
30	AACACCGGTTCGTTTCATGCTCAC	GGGCCCGAATTCCGCATGATGC
31	AACACCGGTGTGGTCGAAGGTCGG	GGGCCCGAATTCCGCCGTAGTA
32	AACACCGGTGGTAATTTAGAGGTA	GGGCCCGAATTCCGTAGGGCCC
33	AACACCGGTGACATTGGGTACAGG	GGGCCCGAATTCCGTGTTGTCT
34	AACACCGGTACCTTTGTTGATGCT	GGGCCCGAATTCCTACTCGGCC
35	AACACCGGTCAAGAGCTAACGCGT	GGGCCCGAATTCCTGAGTTTTA
36	AACACCGGTTGTGTCACCTTCACA	GGGCCCGAATTCCTGCTATCGA
37	AACACCGGTGTAATCCAAAGCTAT	GGGCCCGAATTCCTTTTGTCGG
38	AACACCGGTCGGCGGCAATCGTGG	GGGCCCGAATTCGAAGACCCGC
39	AACACCGGTAGCAAGTGCGAGACG	GGGCCCGAATTCGACACAGACA
40	AACACCGGTGTACACAGAGTCGAC	GGGCCCGAATTCGACCTCCAAT
41	AACACCGGTCCAAAATGTCGCCAC	GGGCCCGAATTCGATACCCCCA
42	AACACCGGTCGATAGATAATTCGG	GGGCCCGAATTCGCCAAGATGG
43	AACACCGGTTAGCAGCCAATTGCG	GGGCCCGAATTCGCCAGCCGCT
44	AACACCGGTCAGGTCACGTCGTCT	GGGCCCGAATTCGCCCCATTCC
45	AACACCGGTGACTCAATATACCAG	GGGCCCGAATTCGCGAAGTCCC
46	AACACCGGTGCCAATGTGGTTGCG	GGGCCCGAATTCGCTCTACGCC
47	AACACCGGTGTGGCTGAGAGTCCG	GGGCCCGAATTCGGCACCCTCC
48	AACACCGGTAAATTTGAGGCTCCG	GGGCCCGAATTCGGCCCCTACA
49	AACACCGGTTGGGGCAGCGGCAAG	GGGCCCGAATTCGGGTGACACG
50	AACACCGGTTAAAGTAAATTGCGA	GGGCCCGAATTCGTACACAATT
51	AACACCGGTAGTTCTCAGAGGAAG	GGGCCCGAATTCGTCAAATACC
52	AACACCGGTTCCCGTCCAGTAATC	GGGCCCGAATTCGTGGAGCCTC
53	AACACCGGTTAATGGGACCGCAGG	GGGCCCGAATTCTAACTGCTCT
54	AACACCGGTAACTATATTCATGCG	GGGCCCGAATTCTAACTTATAC
55	AACACCGGTCGTTGTAGCAACCTA	GGGCCCGAATTCTAGCCATGCA
56	AACACCGGTTATATTTGTAAGTGT	GGGCCCGAATTCTCTATCGAGG
57	AACACCGGTTAAGCTCCCGTGCCC	GGGCCCGAATTCTCTCTAGATC
58	AACACCGGTTACATTGAGAACTTC	GGGCCCGAATTCTTAGCTATGT
59	AACACCGGTTAAGCCGAGGAGTTA	GGGCCCGAATTCTTGAGCATAA
60	AACACCGGTAGCAGCGGCAGGCGT	GGGCCCGAATTCTTTGGCACAC
61	AACACCGGTACCACTCCCGTCGGG	GGGCCCGAATTCAAGGCGGATC
62	AACACCGGTAGGAGAGTGGTCACC	GGGCCCGAATTCACAAATCCTG
63	AACACCGGTAGAACATGGTCGACA	GGGCCCGAATTCACGTCGCGGA
64	AACACCGGTCCTGTCGCCACGGGT	GGGCCCGAATTCAGCACACCCA
65	truncated hgRNA	truncated hgRNA
66	AACACCGGTAATAATTCCTGCCGG	GGGCCCGAATTCAGGTGTTCAA
67	AACACCGGTTACCTGGGACGCTAT	GGGCCCGAATTCATAGCTGATG
68	AACACCGGTATATAAAAATACGAG	GGGCCCGAATTCATGACCCACC
69	AACACCGGTCGTCGCTATATCATT	GGGCCCGAATTCATGGAGGGAC
70	AACACCGGTAGACCCTGTTGCTTC	GGGCCCGAATTCATGTCATCGA
71	AACACCGGTTTCCCAAAAGGAGCT	GGGCCCGAATTCCAAGGGCCCT
72	AACACCGGTACAACCGTCTCACTT	GGGCCCGAATTCCAATCCGACT
73	AACACCGGTGCGGCGAGGTCGTTC	GGGCCCGAATTCCACCTCGGAC
74	AACACCGGTACCTGTAGATTTGTT	GGGCCCGAATTCCACGGGTAAT
75	truncated hgRNA	truncated hgRNA
76	AACACCGGTCACGCGCCTATATGC	GGGCCCGAATTCCATACCCCAC
77	AACACCGGTCTCGTATCCATGTAT	GGGCCCGAATTCCATATATTCC
78	AACACCGGTGGCAATAGGATGAGT	GGGCCCGAATTCCCACCATCCG
79	AACACCGGTAAATTTAGCATCGAT	GGGCCCGAATTCCCACTAACTT
80	AACACCGGTACTCCGGAAGGCCAA	GGGCCCGAATTCCCGTACTTCA
81	AACACCGGTGCAGCGAACAAGTAC	GGGCCCGAATTCCCTACAACAG
82	AACACCGGTAGCTGGGACCATCGA	GGGCCCGAATTCCCTTAAGCGC
83	AACACCGGTCTTGGTTCTAGGGTA	GGGCCCGAATTCCGGGGGTTCC
84	AACACCGGTCCAAAGGCGTCGGAC	GGGCCCGAATTCCGGTCTGTAC
85	AACACCGGTCATGTCAATGCGGTG	GGGCCCGAATTCCTCGTAAGTC
86	AACACCGGTGCAAAAGGGGTAGTG	GGGCCCGAATTCGAACCGCTGG
87	AACACCGGTCGGCCAGAGGTAATC	GGGCCCGAATTCGACCCTTCCT
88	AACACCGGTGCAAGTACCTTCTGG	GGGCCCGAATTCGACGAAGACA
89	AACACCGGTTTCCACGGCGCACAT	GGGCCCGAATTCGACGGTTCCA
90	AACACCGGTGCATATAGGAGTGCA	GGGCCCGAATTCGACTCTGGCC
91	AACACCGGTGACACAAGTGTGGAT	GGGCCCGAATTCGAGCGCTGGG
92	AACACCGGTAATCAGAGGTGAACG	GGGCCCGAATTCGCCAACGAGC
93	AACACCGGTAAGTTTCTTCATCGG	GGGCCCGAATTCGCCCACCACA
94	AACACCGGTCCCTCCGCATACAGC	GGGCCCGAATTCGCCCAGATAC
95	AACACCGGTGTCCGCTGCCAGCTC	GGGCCCGAATTCGCGTCGCCCT
96	AACACCGGTTGTCCCTCCATAGGG	GGGCCCGAATTCGGCCTTTGAC
97	AACACCGGTCCCGGTAGAACCAAA	GGGCCCGAATTCGGCGACCGCA
98	AACACCGGTCCATCCATGAAGGTC	GGGCCCGAATTCGTATCCCGAG
99	AACACCGGTGATAAAGGGCTGAGA	GGGCCCGAATTCTACACAGATA
100	AACACCGGTTCGCGCGGAATCTTT	GGGCCCGAATTCTACACCCCAC
101	AACACCGGTTCGGCCTCTTTAAGA	GGGCCCGAATTCTAGAACCATG
102	AACACCGGTAGCAAGAGTACGGCT	GGGCCCGAATTCTCATACGGGC
103	AACACCGGTGAGAAACCTTTCTAA	GGGCCCGAATTCTCATCAGGCC
104	AACACCGGTGTAGCCAGTGTAGAC	GGGCCCGAATTCTCTCCGGGCA
105	AACACCGGTAACCAGCGCATGCTC	GGGCCCGAATTCTCTTATAACC
106	AACACCGGTACACCGCGTAATGGT	GGGCCCGAATTCTGACGGTTCT
107	AACACCGGTAAAGGGAGACTACCC	GGGCCCGAATTCTGCCAGCTGA
108	AACACCGGTCAAACCTGGATAGAA	GGGCCCGAATTCTGGTGATGGT
109	AACACCGGTCTGGCGAATTGCTGA	GGGCCCGAATTCTGGTTTCTTT
110	AACACCGGTGTGGAACGGGGCCCC	GGGCCCGAATTCTTACCACGAA
111	AACACCGGTGGGTAGCTGGGTGCC	GGGCCCGAATTCTTATCGTTCA
112	AACACCGGTCGTTATCAACTCATG	GGGCCCGAATTCTTGTGACATA
